# Supplementary material for: Urine proteomics for prediction of disease progression in patients with IgA nephropathy
Source: PubMed Central journal article supplement — Nephrol Dial Transplant. 2020 Dec 14;37(1):42–52. doi: 10.1093/ndt/gfaa307 (PMC8719618; doi:10.1093/ndt/gfaa307), 2020-12-14
Supplement: gfaa307_supplementary_data.pdf [file gfaa307_supplementary_data.pdf]

| Peptide ID | Mass [Da] | CE-Time [Min] | P-value (wilcoxon) | corrected P-value (BH) | Amplitude progressors | Amplitude non-progressors | Fold change | Sequence                  | Protein Symbol | Protein Name                          | Modification | Position of modification | Protein accession | StartAA | StopAA |
|------------|-----------|---------------|--------------------|------------------------|-----------------------|---------------------------|-------------|---------------------------|----------------|---------------------------------------|--------------|--------------------------|-------------------|---------|--------|
| 99915883   | 2946,36   | 29,93         | 1,73E-05           | 1,05E-02               | 8,96                  | 58,32                     | 0,1536      | NSGEPGApGSKGDTGAKGEpGPVGV |                |                                       |              |                          |                   |         |        |
| 99910985   | 2153,97   | 32,91         | 2,27E-05           | 1,05E-02               | 43,83                 | 86,99                     | 0,5039      | QGPPGPAG                  | COL1A1         | Collagen alpha-1(I) chain             |              |                          | P02452            | 432     | 464    |
| 99907573   | 1728,76   | 36,62         | 4,45E-06           | 1,05E-02               | 92,15                 | 292,94                    | 0,3146      | NSGKKGDDQGFQGGPFGPPPGP    | COL16A1        | Collagen alpha-1(XVI) chain           |              |                          | A6NDR9            | 1145    | 1166   |
| 99911683   | 2250,08   | 22,51         | 1,95E-05           | 1,05E-02               | 280,11                | 1297,09                   | 0,2160      | ESVVLPEAT                 | X3CL1          | Fractalkine                           | O-Glycan     | T10(OGlycan / 656.2276)  | P78423            | 123     | 132    |
| 99917739   | 3372,52   | 25,62         | 1,54E-05           | 1,05E-02               | 15,68                 | 116,68                    | 0,1344      |                           |                |                                       |              |                          |                   |         |        |
| 99918718   | 3665,71   | 31,83         | 9,85E-06           | 1,05E-02               | 4,36                  | 46,68                     | 0,0934      |                           |                |                                       |              |                          |                   |         |        |
| 99920734   | 4944,2    | 30,31         | 1,18E-05           | 1,05E-02               | 3,57                  | 36,93                     | 0,0967      |                           |                |                                       |              |                          |                   |         |        |
| 99918629   | 3635,65   | 31,56         | 2,88E-05           | 1,16E-02               | 160,99                | 388,03                    | 0,4149      |                           |                |                                       |              |                          |                   |         |        |
| 99910668   | 2103,96   | 33,08         | 6,71E-05           | 1,23E-02               | 1497,39               | 2131,3                    | 0,7026      | GpPGEAGKpGEQGVpGDLGAPGp   | COL1A1         | Collagen alpha-1(I) chain             |              |                          | P02452            | 650     | 672    |
| 99914456   | 2689,42   | 45,92         | 5,00E-05           | 1,23E-02               | 28,16                 | 450,67                    | 0,0625      | DLQVGVQLGGGPGAGSLQPLALEG  |                |                                       |              |                          |                   |         |        |
| 99910592   | 2089,97   | 39,22         | 6,88E-05           | 1,23E-02               | 19,09                 | 82,98                     | 0,2301      | SLQ                       | INS            | Insulin                               |              |                          | P01308            | 60      | 87     |
| 99912421   | 2344,03   | 33,58         | 4,13E-05           | 1,23E-02               | 15,51                 | 90,66                     | 0,1711      |                           |                |                                       |              |                          |                   |         |        |
| 99915468   | 2865,1    | 39,66         | 5,92E-05           | 1,23E-02               | 18,62                 | 68,15                     | 0,2732      |                           |                |                                       |              |                          |                   |         |        |
| 99917538   | 3324,49   | 39,06         | 6,41E-05           | 1,23E-02               | 8,8                   | 90,34                     | 0,0974      |                           |                |                                       |              |                          |                   |         |        |
| 99918018   | 3453,53   | 36,6          | 6,35E-05           | 1,23E-02               | 2,45                  | 33,82                     | 0,0724      |                           |                |                                       |              |                          |                   |         |        |
| 99918639   | 3638,69   | 31,88         | 3,57E-05           | 1,23E-02               | 4,38                  | 50,27                     | 0,0871      |                           |                |                                       |              |                          |                   |         |        |
| 99918781   | 3685,73   | 32,58         | 5,00E-05           | 1,23E-02               | 3,39                  | 29,62                     | 0,1144      |                           |                |                                       |              |                          |                   |         |        |
| 99920573   | 4743,13   | 29,85         | 4,67E-05           | 1,23E-02               | 9,06                  | 59,19                     | 0,1531      |                           |                |                                       |              |                          |                   |         |        |
| 99904786   | 1419,66   | 28,74         | 7,40E-05           | 1,25E-02               | 69,59                 | 122,18                    | 0,5696      | SpGSPGPDGKTGPPGP          | COL1A1         | Collagen alpha-1(I) chain             |              |                          | P02452            | 543     | 559    |
| 99917505   | 3318,52   | 30,97         | 1,04E-04           | 1,57E-02               | 122,02                | 283,96                    | 0,4297      | AGRpGEVGPpGPpGPAGEKSGPGAD |                |                                       |              |                          |                   |         |        |
| 99917388   | 3288,52   | 36,49         | 1,02E-04           | 1,57E-02               | 99,88                 | 204,59                    | 0,4882      | GPpGppGRDGEDGPTGPpGPPGPPG | COL1A1         | Collagen alpha-1(I) chain             |              |                          | P02452            | 916     | 953    |
| 99918367   | 3553,62   | 31,11         | 1,07E-04           | 1,57E-02               | 3,31                  | 49,02                     | 0,0675      | PPGLGNFAAQ                | COL1A2         | Collagen alpha-2(I) chain             |              |                          | P08123            | 45      | 80     |
| 99916194   | 3018,54   | 45,91         | 1,26E-04           | 1,67E-02               | 26,62                 | 623,15                    | 0,0427      | EAEDLQVGVQLGGGPGAGSLQPLA  |                |                                       |              |                          |                   |         |        |
| 99911505   | 2227,97   | 33,25         | 1,27E-04           | 1,67E-02               | 51,36                 | 147,53                    | 0,3481      | LEGSLQ                    | INS            | Insulin                               |              |                          | P01308            | 57      | 87     |
| 99903183   | 1250,64   | 20,58         | 1,43E-04           | 1,67E-02               | 629,63                | 3135,44                   | 0,2008      |                           |                |                                       |              |                          |                   |         |        |
| 99911548   | 2234,01   | 22,44         | 1,42E-04           | 1,67E-02               | 31,8                  | 134,62                    | 0,2362      |                           |                |                                       |              |                          |                   |         |        |
| 99912656   | 2376,1    | 27,13         | 1,45E-04           | 1,67E-02               | 20,56                 | 76,86                     | 0,2675      |                           |                |                                       |              |                          |                   |         |        |
| 99918919   | 3739,67   | 32,26         | 1,31E-04           | 1,67E-02               | 2,68                  | 18,87                     | 0,1420      |                           |                |                                       |              |                          |                   |         |        |
| 99910573   | 2087,96   | 32,87         | 1,51E-04           | 1,68E-02               | 987,11                | 1499,34                   | 0,6584      | GPPGEAGKpGEQGVpGDLGAPGP   | COL1A1         | Collagen alpha-1(I) chain             |              |                          | P02452            | 650     | 672    |
| 99917952   | 3435,56   | 36,6          | 1,60E-04           | 1,72E-02               | 9,53                  | 48,51                     | 0,1965      |                           |                |                                       |              |                          |                   |         |        |
| 99912693   | 2382,14   | 19,8          | 1,69E-04           | 1,75E-02               | 31,22                 | 51,49                     | 0,6063      | GPAGpPGKAGEDGHPGKpGRpGERG | COL1A2         | Collagen alpha-2(I) chain             |              |                          | P08123            | 133     | 157    |
| 99908756   | 1860,87   | 22,97         | 1,77E-04           | 1,78E-02               | 0,95                  | 44,04                     | 0,0216      |                           |                |                                       |              |                          |                   |         |        |
| 99908185   | 1793,89   | 32,41         | 1,88E-04           | 1,79E-02               | 108,3                 | 412,91                    | 0,2623      | EEAPSLRPAPPISGGGY         | FGB            | Fibrinogen beta chain                 |              |                          | P02675            | 54      | 71     |
| 99910730   | 2112,93   | 24,29         | 1,85E-04           | 1,79E-02               | 14,13                 | 115,63                    | 0,1222      |                           |                |                                       |              |                          |                   |         |        |
| 99914501   | 2697,23   | 29,13         | 1,95E-04           | 1,79E-02               | 98,36                 | 152,89                    | 0,6433      | pPGADGQPGAKGEpGDAGAKGDAGp |                |                                       |              |                          |                   |         |        |
| 99909057   | 1892,85   | 31,7          | 2,08E-04           | 1,86E-02               | 3,49                  | 35,74                     | 0,0976      | PGPAGP                    | COL1A1         | Collagen alpha-1(I) chain             |              |                          | P02452            | 816     | 846    |
| 99903148   | 1247,65   | 21,65         | 2,92E-04           | 2,34E-02               | 1279,9                | 275,75                    | 4,6415      | GpAGATGDRGEAGAAGPAGpAGP   | COL1A2         | Collagen alpha-2(I) chain             |              |                          | P08123            | 685     | 707    |
| 99910838   | 2130,97   | 32,98         | 2,98E-04           | 2,34E-02               | 25,77                 | 61,51                     | 0,4190      | FMGKVVNPTQK               | SERPINA1       | Alpha-1-antitrypsin                   |              |                          | P01009            | 408     | 418    |
| 99909549   | 1950,87   | 21,35         | 2,87E-04           | 2,34E-02               | 13,86                 | 69,28                     | 0,2001      | GpTGpIGPpGpAGQPGDKGEGGAP  | COL3A1         | Collagen alpha-1(III) chain           |              |                          | P02461            | 762     | 785    |
| 99912995   | 2432,07   | 26,66         | 2,97E-04           | 2,34E-02               | 25,33                 | 122,47                    | 0,2068      |                           |                |                                       |              |                          |                   |         |        |
| 99917291   | 3266,48   | 29,96         | 2,79E-04           | 2,34E-02               | 26,64                 | 90,2                      | 0,2953      |                           |                |                                       |              |                          |                   |         |        |
| 99908885   | 1873,97   | 21,51         | 3,13E-04           | 2,40E-02               | 3223,72               | 6243,43                   | 0,5163      | AAHLPAEFTPAVHASLKD        | HBA1           | Hemoglobin subunit alpha              |              |                          | P69905            | 111     | 128    |
| 99917047   | 3209,43   | 22,73         | 3,33E-04           | 2,42E-02               | 2828,47               | 4810,36                   | 0,5880      | PpGESGREGApGAEGSpGRDGSpGA |                |                                       |              |                          |                   |         |        |
| 99906068   | 1567,71   | 20,23         | 3,54E-04           | 2,42E-02               | 326,45                | 545,87                    | 0,5980      | KGDRGETGP                 | COL1A1         | Collagen alpha-1(I) chain             |              |                          | P02452            | 1008    | 1041   |
| 99909564   | 1952,92   | 32,32         | 3,60E-04           | 2,42E-02               | 18,51                 | 96,54                     | 0,1917      | NDGApGKNGERGpGGP          | COL3A1         | Collagen alpha-1(III) chain           |              |                          | P02461            | 586     | 602    |
| 99913909   | 2597,36   | 23,32         | 3,52E-04           | 2,42E-02               | 902,04                | 5019,41                   | 0,1797      | GEKpSSEAGTAGPpGTpGPQG     | COL1A2         | Collagen alpha-2(I) chain             |              |                          | P08123            | 844     | 865    |
| 99916383   | 3057,39   | 29,96         | 3,38E-04           | 2,42E-02               | 195,04                | 357,31                    | 0,5459      |                           |                |                                       |              |                          |                   |         |        |
| 99919269   | 3864,86   | 33,44         | 3,28E-04           | 2,42E-02               | 10,11                 | 68,4                      | 0,1478      |                           |                |                                       |              |                          |                   |         |        |
| 99913224   | 2476,19   | 34,9          | 3,72E-04           | 2,44E-02               | 17,26                 | 81,98                     | 0,2105      |                           |                |                                       |              |                          |                   |         |        |
| 99917882   | 3414,56   | 31,07         | 3,85E-04           | 2,48E-02               | 4,59                  | 31,78                     | 0,1444      |                           |                |                                       |              |                          |                   |         |        |
| 99906402   | 1605,73   | 29,89         | 4,03E-04           | 2,54E-02               | 11,3                  | 57,83                     | 0,1954      | WQGVVEGEGAGQKDF           | HSPG2          | Basement membrane-specific heparan su |              |                          | P98160            | 4245    | 4259   |

| Peptide ID | Mass [Da] | CE-Time [Min] | P-value (wilcoxon) | corrected P-value (BH) | Amplitude progressors | Amplitude non-progressors | Fold change | Sequence                  | Protein Symbol | Protein Name                           | Modification | Position of modification | Protein accession | StartAA | StopAA |
|------------|-----------|---------------|--------------------|------------------------|-----------------------|---------------------------|-------------|---------------------------|----------------|----------------------------------------|--------------|--------------------------|-------------------|---------|--------|
| 99912198   | 2319,04   | 33,85         | 4,17E-04           | 2,54E-02               | 134,56                | 344,73                    | 0,3903      | AGppGEAGKPGEGVpGDLGApGPS  |                |                                        |              |                          |                   |         |        |
| 99918626   | 3634,67   | 31,66         | 4,14E-04           | 2,54E-02               | 4,7                   | 44,85                     | 0,1048      | G                         | COL1A1         | Collagen alpha-1(I) chain              |              |                          | P02452            | 649     | 674    |
| 99915805   | 2932,32   | 33,99         | 4,35E-04           | 2,60E-02               | 58,29                 | 90,57                     | 0,6436      |                           |                |                                        |              |                          |                   |         |        |
| 99908447   | 1822,83   | 26,99         | 4,45E-04           | 2,60E-02               | 66,18                 | 155,47                    | 0,4257      |                           |                |                                        |              |                          |                   |         |        |
| 99917721   | 3367,71   | 22,57         | 4,68E-04           | 2,65E-02               | 590,22                | 1210,09                   | 0,4877      |                           |                |                                        |              |                          |                   |         |        |
| 99919422   | 3943,83   | 33,54         | 4,63E-04           | 2,65E-02               | 52,36                 | 158,2                     | 0,3310      |                           |                |                                        |              |                          |                   |         |        |
| 99913650   | 2554,19   | 34,51         | 4,78E-04           | 2,66E-02               | 20,96                 | 63,72                     | 0,3289      | GpTGATGDKGPPGPVPPGSNGpVG  |                |                                        |              |                          |                   |         |        |
| 99917270   | 3262,5    | 22,36         | 4,89E-04           | 2,67E-02               | 10,28                 | 54,77                     | 0,1877      | EpGP                      | COL5A2         | Collagen alpha-2(V) chain              |              |                          | P05997            | 1020    | 1048   |
| 99905463   | 1496,66   | 29,71         | 5,69E-04           | 2,76E-02               | 60,81                 | 258,26                    | 0,2355      | ApGDKGESGSPGAPGPT         | COL1A1         | Collagen alpha-1(I) chain              |              |                          | P02452            | 777     | 793    |
| 99913207   | 2472,12   | 27,95         | 6,00E-04           | 2,76E-02               | 57,36                 | 103,28                    | 0,5554      | PpGADGQpGAKGEPGDAGAKGDAGP |                |                                        |              |                          |                   |         |        |
| 99910386   | 2062,93   | 26,46         | 5,92E-04           | 2,76E-02               | 209,41                | 499,58                    | 0,4192      | pGP                       | COL1A1         | Collagen alpha-1(I) chain              |              |                          | P02452            | 816     | 843    |
| 99911191   | 2185,96   | 32,91         | 5,53E-04           | 2,76E-02               | 98,01                 | 218,86                    | 0,4478      | DAGAPApGGKGDAGApGERGpPG   | COL3A1         | Collagen alpha-1(III) chain            |              |                          | P02461            | 664     | 687    |
| 99900553   | 927,44    | 24,07         | 5,98E-04           | 2,76E-02               | 580,19                | 1156,96                   | 0,5015      | NSGEKGDQGFQGGpGFPpGP      | COL16A1        | Collagen alpha-1(XVI) chain            |              |                          | A6NDR9            | 1145    | 1166   |
| 99901109   | 1010,52   | 20,72         | 5,50E-04           | 2,76E-02               | 23,32                 | 346,13                    | 0,0674      | GGSPKGDVDP                | FXD2           | Sodium/potassium-transporting ATPase s |              |                          | P54710            | 9       | 18     |
| 99911047   | 2164,99   | 43,03         | 5,65E-04           | 2,76E-02               | 5,46                  | 68,53                     | 0,0797      |                           |                |                                        |              |                          |                   |         |        |
| 99917314   | 3272,52   | 36,28         | 5,61E-04           | 2,76E-02               | 40,36                 | 87,65                     | 0,4605      |                           |                |                                        |              |                          |                   |         |        |
| 99918826   | 3702,71   | 32,53         | 5,93E-04           | 2,76E-02               | 89,25                 | 225,83                    | 0,3952      |                           |                |                                        |              |                          |                   |         |        |
| 99919105   | 3801,72   | 37,77         | 5,89E-04           | 2,76E-02               | 5,33                  | 39,39                     | 0,1353      |                           |                |                                        |              |                          |                   |         |        |
| 99919316   | 3887,82   | 27,55         | 5,72E-04           | 2,76E-02               | 3,82                  | 32,24                     | 0,1185      |                           |                |                                        |              |                          |                   |         |        |
| 99908104   | 1783,78   | 39,77         | 6,25E-04           | 2,84E-02               | 91,88                 | 202,46                    | 0,4538      |                           |                |                                        |              |                          |                   |         |        |
| 99913164   | 2464,1    | 34,15         | 6,61E-04           | 2,84E-02               | 113,13                | 92,82                     | 1,2188      | AVGPPGFAGEKpSGEAGTAGpGTP  |                |                                        |              |                          |                   |         |        |
| 99910976   | 2152,97   | 32,92         | 6,72E-04           | 2,84E-02               | 21,35                 | 70,46                     | 0,3030      | GP                        | COL1A2         | Collagen alpha-2(II) chain             |              |                          | P08123            | 836     | 863    |
| 99912718   | 2386,08   | 34,19         | 6,49E-04           | 2,84E-02               | 28                    | 64,58                     | 0,4336      | TpGVAGpSGEPGMpGKDGQNGVP   | COL9A3         | Collagen alpha-3(IX) chain             |              |                          | Q14050            | 290     | 312    |
| 99914760   | 2747,35   | 20,81         | 6,78E-04           | 2,84E-02               | 220,96                | 1493,22                   | 0,1480      |                           |                |                                        |              |                          |                   |         |        |
| 99918784   | 3686,73   | 32,53         | 6,40E-04           | 2,84E-02               | 11                    | 72,93                     | 0,1508      |                           |                |                                        |              |                          |                   |         |        |
| 99919540   | 4005,8    | 32,96         | 6,79E-04           | 2,84E-02               | 410,12                | 764,69                    | 0,5363      |                           |                |                                        |              |                          |                   |         |        |
| 99907138   | 1684,79   | 40,49         | 7,25E-04           | 3,00E-02               | 59,49                 | 275,66                    | 0,2158      |                           |                |                                        |              |                          |                   |         |        |
| 99910883   | 2137,99   | 25,72         | 7,40E-04           | 3,02E-02               | 126,13                | 413,11                    | 0,3053      |                           |                |                                        |              |                          |                   |         |        |
| 99909989   | 2007,94   | 22,12         | 7,86E-04           | 3,05E-02               | 1485,21               | 2385,94                   | 0,6225      | DGESGRpGRpGERGLpGpPpG     | COL3A1         | Collagen alpha-1(III) chain            |              |                          | P02461            | 230     | 249    |
| 99905087   | 1448,79   | 20,38         | 7,83E-04           | 3,05E-02               | 4700,13               | 22065,97                  | 0,2130      | VVAVANALAHKYH             | HBB            | Hemoglobin subunit beta                |              |                          | P68871            | 134     | 147    |
| 99918914   | 3738,7    | 32,31         | 7,74E-04           | 3,05E-02               | 6,68                  | 37,91                     | 0,1762      |                           |                |                                        |              |                          |                   |         |        |
| 99918948   | 3750,71   | 32,47         | 7,79E-04           | 3,05E-02               | 2,83                  | 24,13                     | 0,1173      |                           |                |                                        |              |                          |                   |         |        |
| 99919577   | 4021,82   | 32,79         | 8,07E-04           | 3,10E-02               | 139,25                | 325,06                    | 0,4284      |                           |                |                                        |              |                          |                   |         |        |
| 99904702   | 1410,65   | 23,91         | 8,18E-04           | 3,10E-02               | 4,27                  | 20,24                     | 0,2110      |                           |                |                                        |              |                          |                   |         |        |
| 99908978   | 1882,8    | 20,24         | 8,53E-04           | 3,20E-02               | 11364,24              | 16164,79                  | 0,7030      | DEAGSEADHEGTHSTKRG        | FGA            | Fibrinogen alpha chain                 |              |                          | P02671            | 605     | 622    |
| 99918452   | 3576,72   | 32,33         | 8,66E-04           | 3,21E-02               | 3,37                  | 40,69                     | 0,0828      |                           |                |                                        |              |                          |                   |         |        |
| 99920285   | 4438,98   | 32,58         | 8,77E-04           | 3,21E-02               | 26,38                 | 128,11                    | 0,2059      |                           |                |                                        |              |                          |                   |         |        |
| 99918536   | 3603,69   | 32,96         | 9,01E-04           | 3,23E-02               | 16,25                 | 70,61                     | 0,2301      | ADGQPGAKGEpGDAGAKGDAGPPGP |                |                                        |              |                          |                   |         |        |
| 99908775   | 1863,02   | 21,13         | 9,00E-04           | 3,23E-02               | 586,64                | 2364,94                   | 0,2481      | AGpApPGPIGNVGApG          | COL1A1         | Collagen alpha-1(I) chain              |              |                          | P02452            | 819     | 860    |
| 99911013   | 2158,97   | 33,2          | 9,37E-04           | 3,28E-02               | 1350,32               | 1939,68                   | 0,6962      | AGpPGEAGKpGEQGVpGDLGApGP  | COL1A1         | Collagen alpha-1(I) chain              |              |                          | P02452            | 649     | 672    |
| 99908539   | 1835,84   | 24,19         | 9,37E-04           | 3,28E-02               | 3721,37               | 3915,51                   | 0,9504      | ApGApGGKGDAGApGERGpPG     | COL3A1         | Collagen alpha-1(III) chain            |              |                          | P02461            | 667     | 687    |
| 99908574   | 1840,83   | 42,16         | 9,49E-04           | 3,29E-02               | 44                    | 150,43                    | 0,2925      | SGETGPAGpPNPpPPGpGP       | COL2A1         | Collagen alpha-1(II) chain             |              |                          | P02458            | 1193    | 1213   |
| 99906609   | 1626,7    | 29,75         | 9,74E-04           | 3,31E-02               | 1675,91               | 24,77                     | 67,6589     | DPEVRPTSA                 | APOC3          | Apolipoprotein C-III                   | O-Glycan     | T7(OGlycan / 656.2276)   | P02656            | 88      | 96     |
| 99914847   | 2763,24   | 28,92         | 9,73E-04           | 3,31E-02               | 53,31                 | 81,27                     | 0,6560      | FAGPpGADGQpGAKGEPGDAGAKGD |                |                                        |              |                          |                   |         |        |
| 99908005   | 1771,79   | 31,07         | 1,01E-03           | 3,37E-02               | 109,64                | 273,59                    | 0,4007      | AGPpGP                    | COL1A1         | Collagen alpha-1(I) chain              |              |                          | P02452            | 813     | 843    |
| 99916606   | 3108,46   | 31,19         | 1,07E-03           | 3,37E-02               | 309,1                 | 543,31                    | 0,5689      | TGPAGRpGEVGPpGPpGPAG      | COL1A1         | Collagen alpha-1(I) chain              |              |                          | P02452            | 913     | 932    |
| 99916656   | 3121,43   | 30,16         | 1,08E-03           | 3,37E-02               | 669,67                | 1147,16                   | 0,5838      | ADGQpGAKGEpGDAGAKGDAGpPpG |                |                                        |              |                          |                   |         |        |
| 99916219   | 3023,39   | 24,66         | 1,10E-03           | 3,37E-02               | 285,78                | 576,19                    | 0,4960      | AGPAGpPIG                 | COL1A1         | Collagen alpha-1(I) chain              |              |                          | P02452            | 819     | 854    |
| 99905466   | 1496,68   | 39,73         | 1,11E-03           | 3,37E-02               | 126,21                | 281,65                    | 0,4481      | FAGpPGADGQpGAKGEQGEAGQKGD |                |                                        |              |                          |                   |         |        |
| 99909700   | 1969,89   | 32,45         | 1,10E-03           | 3,37E-02               | 13,64                 | 83,13                     | 0,1641      | AGApGpQGP                 | COL2A1         | Collagen alpha-1(II) chain             |              |                          | P02458            | 835     | 868    |
|            |           |               |                    |                        |                       |                           |             | ppGAKGQEGAHGAPGAAGNPGAPGH |                |                                        |              |                          |                   |         |        |
|            |           |               |                    |                        |                       |                           |             | VGAPGSPpP                 | COL22A1        | Collagen alpha-1(XXII) chain           |              |                          | Q8NFW1            | 899     | 933    |
|            |           |               |                    |                        |                       |                           |             | QGPAGPpGPpGPpGPpG         | COL1A2         | Collagen alpha-2(I) chain              |              |                          | P08123            | 1086    | 1102   |
|            |           |               |                    |                        |                       |                           |             | FAGEKGPSGEAGTAGPpGpGP     | COL1A2         | Collagen alpha-2(II) chain             |              |                          | P08123            | 842     | 863    |

| Peptide ID | Mass [Da] | CE-Time [Min] | P-value (wilcoxon) | corrected P-value (BH) | Amplitude progressors | Amplitude non-progressors | Fold change | Sequence                                                             | Protein Symbol | Protein Name               | Modification | Position of modification | Protein accession | StartAA | StopAA |  |
|------------|-----------|---------------|--------------------|------------------------|-----------------------|---------------------------|-------------|----------------------------------------------------------------------|----------------|----------------------------|--------------|--------------------------|-------------------|---------|--------|--|
| 99904994   | 1440,56   | 24,22         | 1,09E-03           | 3,37E-02               | 41,14                 | 149,12                    | 0,2759      | DEAGSEADHEGTHS                                                       | FGA            | Fibrinogen alpha chain     |              |                          | P02671            | 605     | 618    |  |
| 99917279   | 3264,53   | 30,51         | 1,10E-03           | 3,37E-02               | 262,2                 | 435,64                    | 0,6019      |                                                                      |                |                            |              |                          |                   |         |        |  |
| 99913449   | 2522,12   | 26,75         | 1,05E-03           | 3,37E-02               | 27,93                 |                           |             |                                                                      |                |                            |              |                          |                   |         |        |  |
| 99918203   | 3510,61   | 39,86         | 1,03E-03           | 3,37E-02               | 41,88                 | 138,89                    | 0,3015      |                                                                      |                |                            |              |                          |                   |         |        |  |
| 99920565   | 4730,08   | 35,95         | 1,08E-03           | 3,37E-02               | 32,72                 |                           |             |                                                                      |                |                            |              |                          |                   |         |        |  |
| 99917078   | 3219,27   | 44,25         | 1,16E-03           | 3,48E-02               | 37,63                 | 153,23                    | 0,2456      |                                                                      |                |                            |              |                          |                   |         |        |  |
| 99918016   | 3452,54   | 36,54         | 1,17E-03           | 3,48E-02               | 13,39                 | 49,72                     | 0,2693      |                                                                      |                |                            |              |                          |                   |         |        |  |
| 99901577   | 1073,56   | 25,69         | 1,20E-03           | 3,54E-02               | 592,72                | 983,98                    | 0,6024      | TAELLVKAET                                                           | TTN            | Titin                      |              |                          | Q8WZ42            | 92      | 101    |  |
| 99907093   | 1679,96   | 23,9          | 1,22E-03           | 3,54E-02               | 4807,45               | 11177,04                  | 0,4301      | VIDQSRVNLNLPITR                                                      | UMOD           | Uromodulin                 |              |                          | P07911            | 592     | 606    |  |
| 99918956   | 3754,69   | 37,02         | 1,21E-03           | 3,54E-02               | 162,7                 | 311,05                    | 0,5231      |                                                                      |                |                            |              |                          |                   |         |        |  |
| 99916474   | 3076,46   | 31,08         | 1,37E-03           | 3,56E-02               | 7,72                  | 45,5                      | 0,1697      | ADGQPGAKGEpGDAGAKGDAGpPGP<br>AGPAGPPGPIG                             | COL1A1         | Collagen alpha-1(I) chain  |              |                          | P02452            | 819     | 854    |  |
| 99918627   | 3634,7    | 32,7          | 1,32E-03           | 3,56E-02               | 19,55                 | 55,22                     | 0,3540      | FAGpPGADGQPGAKGEpGDAGAKGD<br>AGPpPGPAGPAGpPGPIG                      | COL1A1         | Collagen alpha-1(I) chain  |              |                          | P02452            | 813     | 854    |  |
| 99902531   | 1179,61   | 20,31         | 1,33E-03           | 3,56E-02               | 72,46                 | 603,38                    | 0,1201      |                                                                      |                |                            |              |                          |                   |         |        |  |
| 99908391   | 1816,86   | 33,51         | 1,38E-03           | 3,56E-02               | 11,06                 | 49,53                     | 0,2233      |                                                                      |                |                            |              |                          |                   |         |        |  |
| 99909503   | 1945      | 33,66         | 1,33E-03           | 3,56E-02               | 24,1                  | 67,94                     | 0,3547      |                                                                      |                |                            |              |                          |                   |         |        |  |
| 99909639   | 1963,87   | 31,71         | 1,31E-03           | 3,56E-02               | 242,54                | 458,42                    | 0,5291      |                                                                      |                |                            |              |                          |                   |         |        |  |
| 99909979   | 2006,92   | 21,39         | 1,36E-03           | 3,56E-02               | 14,31                 | 57,33                     | 0,2496      |                                                                      |                |                            |              |                          |                   |         |        |  |
| 99910778   | 2118,99   | 25,43         | 1,31E-03           | 3,56E-02               | 92,45                 | 126,38                    | 0,7315      |                                                                      |                |                            |              |                          |                   |         |        |  |
| 99915056   | 2796,41   | 21,44         | 1,33E-03           | 3,56E-02               | 1533,03               | 3229,16                   | 0,4747      |                                                                      |                |                            |              |                          |                   |         |        |  |
| 99915933   | 2958,27   | 35,34         | 1,37E-03           | 3,56E-02               | 76,2                  | 50,01                     | 1,5237      |                                                                      |                |                            |              |                          |                   |         |        |  |
| 99918679   | 3651,65   | 31,78         | 1,35E-03           | 3,56E-02               | 36,01                 | 86,2                      | 0,4177      |                                                                      |                |                            |              |                          |                   |         |        |  |
| 99918872   | 3720,74   | 22,51         | 1,31E-03           | 3,56E-02               | 93,05                 | 180,76                    | 0,5148      |                                                                      |                |                            |              |                          |                   |         |        |  |
| 99919398   | 3927,84   | 33,6          | 1,33E-03           | 3,56E-02               | 41,67                 | 117,11                    | 0,3558      |                                                                      |                |                            |              |                          |                   |         |        |  |
| 99920091   | 4307,12   | 31,94         | 1,34E-03           | 3,56E-02               | 3,63                  | 97,38                     | 0,0373      |                                                                      |                |                            |              |                          |                   |         |        |  |
| 99919078   | 3790,77   | 32,69         | 1,40E-03           | 3,59E-02               | 6,24                  | 37,93                     | 0,1645      |                                                                      |                |                            |              |                          |                   |         |        |  |
| 99918135   | 3485,58   | 32,1          | 1,46E-03           | 3,65E-02               | 4,73                  | 42,57                     | 0,1111      | ERGEQGPAGSpGFQGLPGpAGPpGE<br>AGKPGEQVPGD                             | COL1A1         | Collagen alpha-1(I) chain  |              |                          | P02452            | 630     | 666    |  |
| 99914848   | 2763,31   | 35,04         | 1,46E-03           | 3,65E-02               | 3,88                  | 43,47                     | 0,0893      |                                                                      |                |                            |              |                          |                   |         |        |  |
| 99916632   | 3114,42   | 30,34         | 1,46E-03           | 3,65E-02               | 158,76                | 291,55                    | 0,5445      |                                                                      |                |                            |              |                          |                   |         |        |  |
| 99912310   | 2332      | 47,4          | 1,55E-03           | 3,73E-02               | 825,5                 | 2275,09                   | 0,3628      | GIHSNISVS                                                            | MUC2           | Mucin-2                    | N-Glycan     | N[1420]                  | Q02817            | 1150    | 1158   |  |
| 99905341   | 1481,75   | 21,2          | 1,56E-03           | 3,73E-02               | 416,75                | 2482,01                   | 0,1679      |                                                                      |                |                            |              |                          |                   |         |        |  |
| 99909119   | 1899,63   | 48,67         | 1,56E-03           | 3,73E-02               | 41,27                 | 162,59                    | 0,2538      |                                                                      |                |                            |              |                          |                   |         |        |  |
| 99915941   | 2959,36   | 48,32         | 1,52E-03           | 3,73E-02               | 46,91                 | 151,02                    | 0,3106      |                                                                      |                |                            |              |                          |                   |         |        |  |
| 99916380   | 3057,21   | 44,36         | 1,56E-03           | 3,73E-02               | 80,61                 | 272,58                    | 0,2957      |                                                                      |                |                            |              |                          |                   |         |        |  |
| 99918479   | 3584,68   | 26,26         | 1,52E-03           | 3,73E-02               | 31,93                 | 134,28                    | 0,2378      |                                                                      |                |                            |              |                          |                   |         |        |  |
| 99902532   | 1179,62   | 19,71         | 1,57E-03           | 3,73E-02               | 23,66                 | 223,8                     | 0,1057      | GVANALAHKYH                                                          | HBD            | Hemoglobin subunit delta   |              |                          | P02042            | 137     | 147    |  |
| 99909408   | 1933,88   | 21,64         | 1,61E-03           | 3,78E-02               | 712,37                | 1259,89                   | 0,5654      | GDDGEAGKpGRPGERGPPGp                                                 | COL1A1         | Collagen alpha-1(I) chain  |              |                          | P02452            | 230     | 249    |  |
| 99911210   | 2187,97   | 32,82         | 1,65E-03           | 3,86E-02               | 64,53                 | 140,33                    | 0,4598      | FWLDLPEVRPTSA                                                        | APOC3          | Apolipoprotein C-III       | O-Glycan     | T11(OGlycan / 656.2276)  | P02656            | 84      | 96     |  |
| 99908228   | 1798,78   | 31,76         | 1,69E-03           | 3,93E-02               | 687,37                | 964,47                    | 0,7127      | GEpGSpGENGApGQMGPpRG                                                 | COL1A1         | Collagen alpha-1(I) chain  |              |                          | P02452            | 287     | 305    |  |
| 99905302   | 1475,73   | 39,9          | 1,79E-03           | 3,96E-02               | 24,36                 | 85,14                     | 0,2861      | VGPpGPPGPPGPPGPPS<br>FAGpPGADGQPGAKGEpGDAGAKGD<br>AGPpPGPAGPAGPPGPIG | COL1A1         | Collagen alpha-1(I) chain  |              |                          | P02452            | 1177    | 1193   |  |
| 99918580   | 3618,69   | 32,79         | 1,82E-03           | 3,96E-02               | 87,38                 | 190,2                     | 0,4594      |                                                                      | COL1A1         | Collagen alpha-1(I) chain  |              |                          | P02452            | 813     | 854    |  |
| 99908521   | 1833,85   | 27,15         | 1,86E-03           | 3,96E-02               | 20,32                 | 75,69                     | 0,2685      |                                                                      |                |                            |              |                          |                   |         |        |  |
| 99911255   | 2193,04   | 20,41         | 1,73E-03           | 3,96E-02               | 11,18                 | 40,59                     | 0,2754      |                                                                      |                |                            |              |                          |                   |         |        |  |
| 99914481   | 2694,19   | 28,38         | 1,79E-03           | 3,96E-02               | 22,13                 | 35,79                     | 0,6183      |                                                                      |                |                            |              |                          |                   |         |        |  |
| 99916509   | 3083,44   | 30,22         | 1,82E-03           | 3,96E-02               | 26,1                  | 86,63                     | 0,3013      |                                                                      |                |                            |              |                          |                   |         |        |  |
| 99916721   | 3137,42   | 30,2          | 1,78E-03           | 3,96E-02               | 239,61                | 428,2                     | 0,5596      |                                                                      |                |                            |              |                          |                   |         |        |  |
| 99917173   | 3240,47   | 30,44         | 1,79E-03           | 3,96E-02               | 16,03                 | 83,32                     | 0,1924      |                                                                      |                |                            |              |                          |                   |         |        |  |
| 99917344   | 3279,57   | 25,57         | 1,86E-03           | 3,96E-02               | 12,97                 | 35,8                      | 0,3623      |                                                                      |                |                            |              |                          |                   |         |        |  |
| 99918907   | 3735,73   | 27,23         | 1,80E-03           | 3,96E-02               | 30,71                 | 107,3                     | 0,2862      |                                                                      |                |                            |              |                          |                   |         |        |  |
| 99920654   | 4831,19   | 26,64         | 1,84E-03           | 3,96E-02               | 12,32                 | 69,43                     | 0,1774      |                                                                      |                |                            |              |                          |                   |         |        |  |
| 99920791   | 5043,25   | 26,62         | 1,85E-03           | 3,96E-02               | 70,33                 | 207,7                     | 0,3386      |                                                                      |                |                            |              |                          |                   |         |        |  |
| 99915691   | 2909,49   | 21,67         | 1,91E-03           | 4,06E-02               | 5006,77               | 4818,3                    | 1,0391      |                                                                      |                |                            |              |                          |                   |         |        |  |
| 99906825   | 1648,27   | 25,51         | 1,93E-03           | 4,06E-02               | 4,45                  | 37,73                     | 0,1179      |                                                                      |                |                            |              |                          |                   |         |        |  |
| 99907812   | 1751,51   | 49,93         | 1,94E-03           | 4,06E-02               | 153,69                | 426,9                     | 0,3600      |                                                                      |                |                            |              |                          |                   |         |        |  |
| 99911122   | 2175,01   | 33,33         | 1,96E-03           | 4,08E-02               | 3851,11               | 4987,52                   | 0,7721      | AGPpGEAGKpGEQGVpGDLGApGP<br>LpGKDGETGAAGPpGPAGPAGERGE                | COL1A1         | Collagen alpha-1(I) chain  |              |                          | P02452            | 649     | 672    |  |
| 99915868   | 2943,36   | 29,78         | 1,97E-03           | 4,08E-02               | 13,51                 | 43,98                     | 0,3072      | QGApPSG                                                              | COL2A1         | Collagen alpha-1(II) chain |              |                          | P02458            | 631     | 663    |  |
